# Supplementary material
Source: publisher figshare collection journal article supplement (https://gsajournals.figshare.com/ndownloader/files/25139216)
Supplement: Supplementary file 1 [file 25139216]

**Table S1. Gene names, previous names, ZFIN identifiers and references for *in situ* hybridization probes.**

| **Gene name** | **Previous names** | **ZFIN ID** | **Reference for probe** |
| --- | --- | --- | --- |
| *hmx1* | *nkx5.3, nkx5-3,* [*im:7155045*](im:7155045)*, zgc:172164* | ZDB-GENE-080204-54 | This publication – see materials and methods. |
| *hmx2* | *nkx5.2* | ZDB-GENE-080506-2 | (Feng and Xu 2010) |
| *hmx3a* | *hmx3, Nkx5-1, nkx5.1, zgc:109845* | ZDB-GENE-001020-1 | (Feng and Xu 2010) |
| *hmx3b* | *si:zfos-911d5.2* | ZDB-GENE-130603-102 | This publication – see materials and methods. |
| *hmx4* | *hmx3b, zfSOHo, wu:fc21b03, zgc:154104* | ZDB-GENE-060825-142 | (Feng and Xu, 2010) |
| *slc32a1* | *viaat, zgc:158324* | ZDB-GENE-061201-1 | (Kimura *et al.* 2006) |
| *en1b* | *eng1b, eng4, engrailed 4, wu:fc84e11, zgc:113499* | ZDB-GENE-980526-6 | Gift of Drs. Kikuci & Westerfield, University of Oregon. |
| *slc17a6a* | *slc17a6l, VGLUT2.2, vglut2b, wu:fj12c01* | ZDB-GENE-050105-4 | (Higashijima *et al.* 2004a; Higashijima *et al.* 2004b) |
| *slc17a6b* | *slc17a6, blu, blumenkohl, si:packt73.2; si:packt90.2, si:xx-packt73.2, VGLUT2.1*, *vglut2a* | ZDB-GENE-030616-554 | (Higashijima *et al.* 2004a; Higashijima *et al.* 2004b) |
| *lhx1a* | *lim1, lim1a, wu:fe25d04, wu:fj36b06* | ZDB-GENE-980526-347 | (Toyama and Dawid 1997) |
| *evx1* | *cb416* | ZDB-GENE-980526-364 | (Thaeron *et al.* 2000) |
| *evx2* | None | ZDB-GENE-980526-215 | (Sordino *et al.* 1996) |
| *slc6a5* | *glyt2, si:dkey-7n10.12* | ZDB-GENE-050105-2 | (Higashijima *et al.* 2004a; Higashijima *et al.* 2004b) |
| *gad1b* | *gad1, GAD67, gad67* | ZDB-GENE-030909-3 | (Higashijima *et al.* 2004a; Higashijima *et al.* 2004b) |
| *krt15* | *wu:fa91c06, wu:fa95d04, zgc:55334* | ZDB-GENE-040426-2931 | (Valentin *et al.* 2007) |
| *pax5* | None | ZDB-GENE-001030-2 | (Pfeffer *et al.* 1998) |

Column 1 lists genes used in this study. Previous names, where known, are provided in column 2. Column 3 contains the unique ZFIN identification number for each gene. Column 4 provides the reference for the *in situ* hybridization RNA riboprobe used in our experiments.
